# Supplementary material for: Wearable triboelectric nanogenerators based on hybridized triboelectric modes for harvesting mechanical energy
Source: Royal Society of Chemistry journal article supplement (doi:10.1039/c8ra03677b), 2018-01-01
Supplement: c8ra03677b1.pdf [file c8ra03677b1.pdf]

## Supporting Information

Wearable triboelectric nanogenerator based on a hybridized  
triboelectric modes for harvesting mechanical energy

*Yu Qiu<sup>1,3,\*</sup>, Dechao Yang<sup>2,\*</sup>, Bing Li<sup>1</sup>, Shuai Shao<sup>1</sup>, Lizhong Hu<sup>1,3</sup>*

<sup>1</sup>School of Physics and Optoelectronic Technology, Dalian University of Technology,  
Dalian 116024, People's Republic of China

<sup>2</sup>Department of Electronic Engineering, Dalian Neusoft University of Information,  
Dalian, 116024, People's Republic of China

<sup>3</sup>The Key Laboratory for Micro/Nano Technology and System of Liaoning Province,  
Dalian University of Technology, Dalian 116024, People's Republic of China

\*Corresponding author: e-mail: [yuqiu@dlut.edu.cn](mailto:yuqiu@dlut.edu.cn)

No output signal of CS-TENG generated when the W-fabric slides only inside G-fabric area because there is no polarization generated in this case.

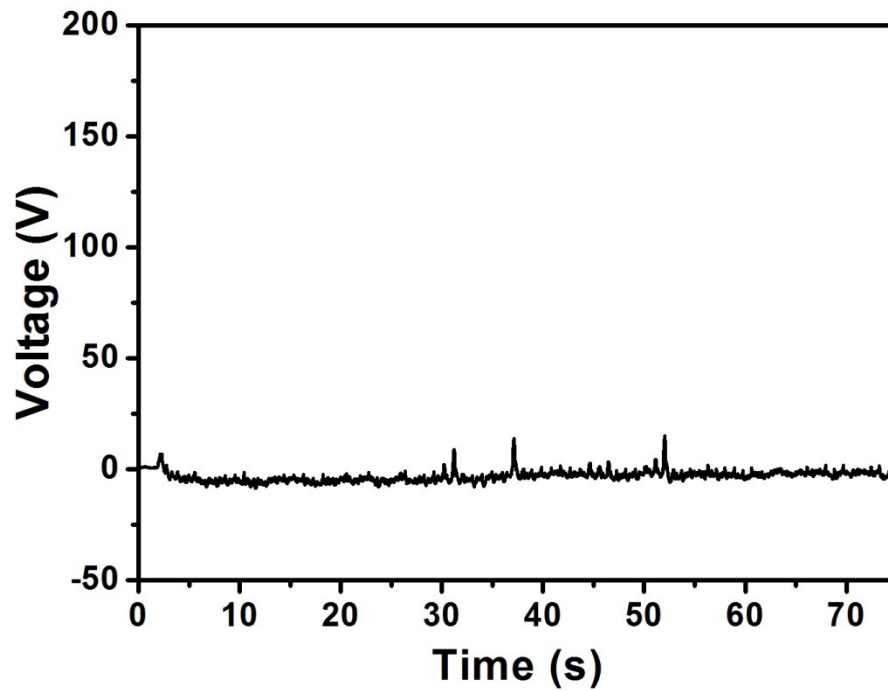

**Fig.S1** Output voltage of CS-TENG when top W-fabric slides only inside G-fabric.

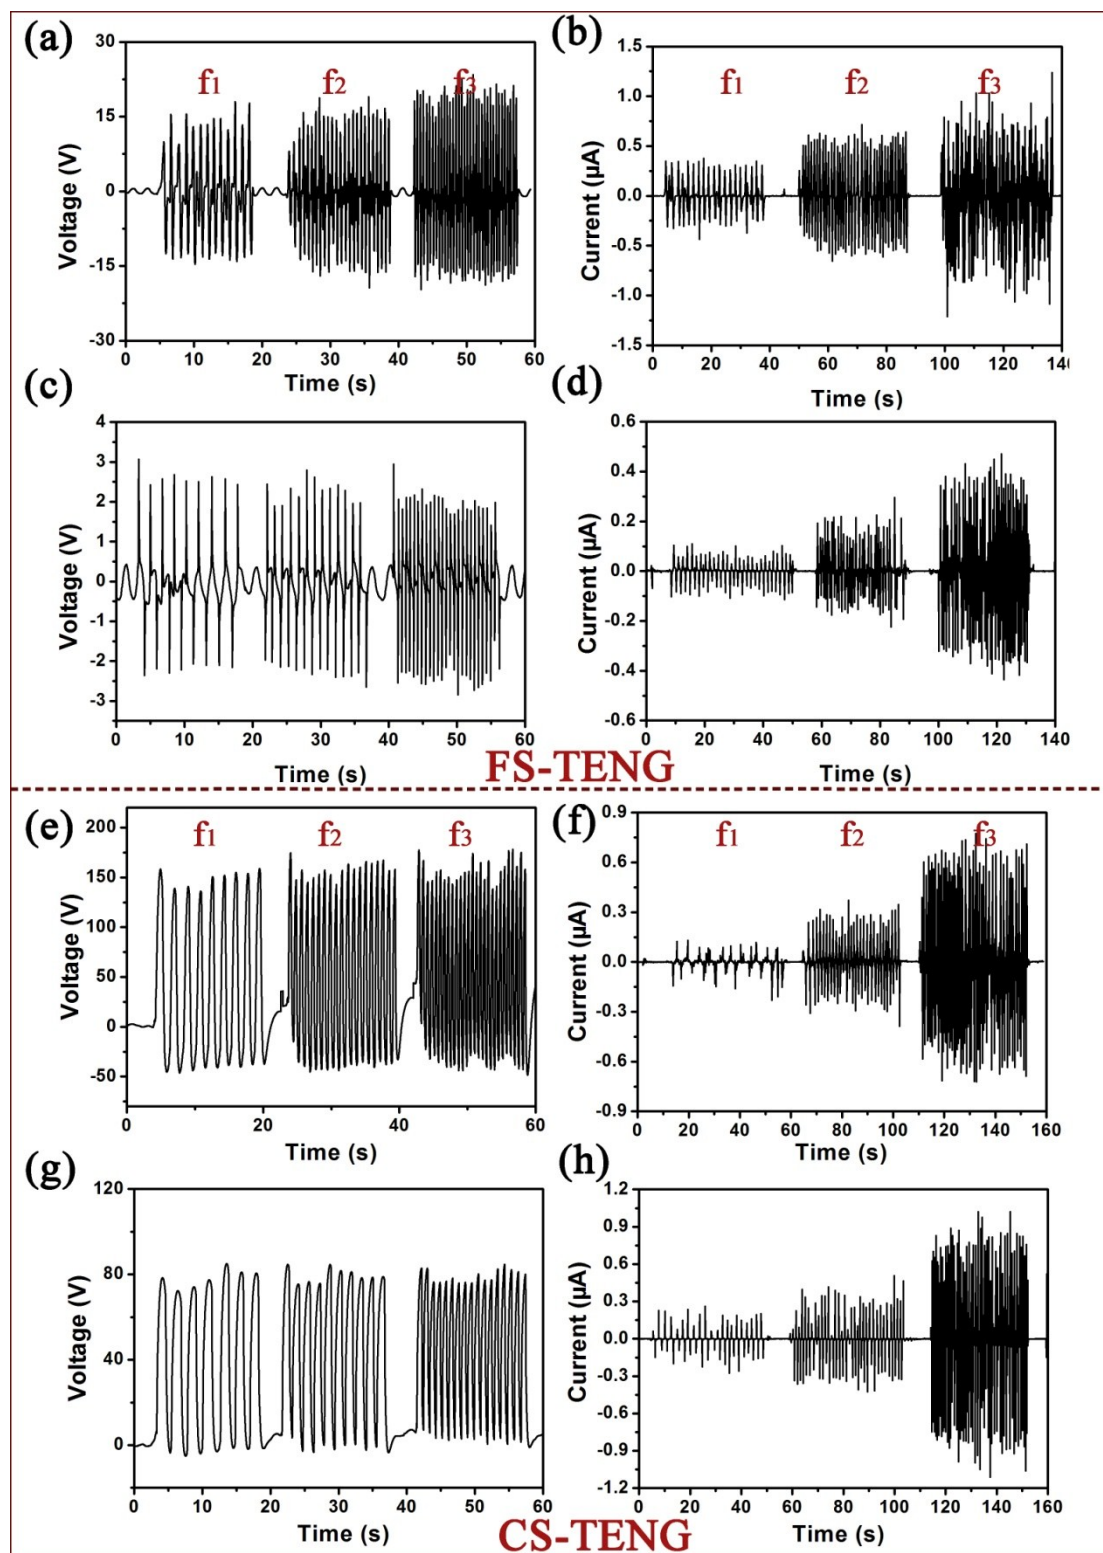

**Fig. S2** Influence of frequency on the output performance of both FS-TENG and CS-TENG fabrics. (a-d) The open circuit voltage ( $V_{oc}$ ) and short circuit current ( $I_{sc}$ ) of FS-TENG in both sliding and contact-separation modes under three different frequency. (e-h) The open circuit voltage ( $V_{oc}$ ) and short circuit current ( $I_{sc}$ ) of CS-TENG in both sliding and contact-separation modes under three different frequency.
